# Supplementary material
Source: Springer Nature journal article supplement (https://www.springermedizin.de/resource/supplementary/13023_2013_624_MOESM2_ESM.pdf/9642516)

## Whole Genome View

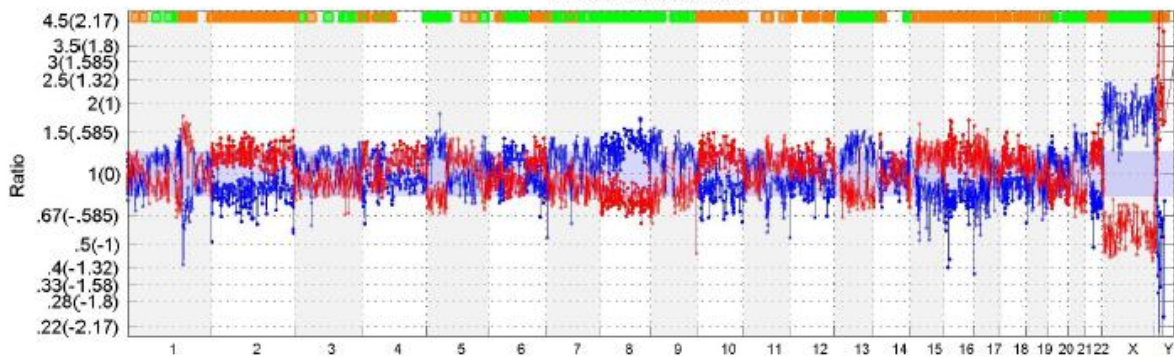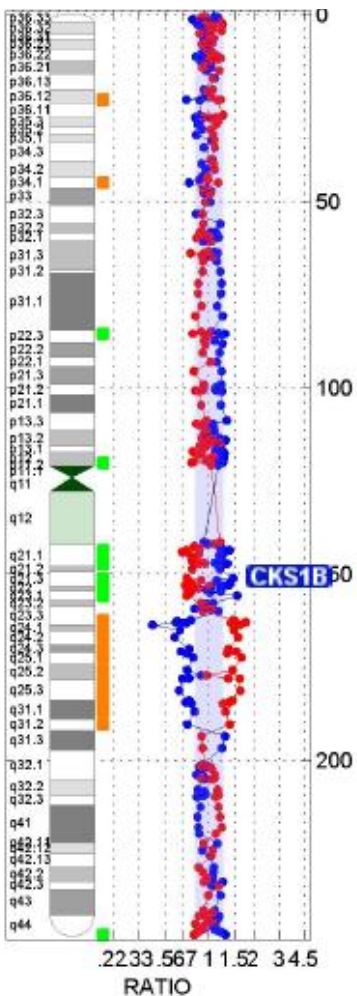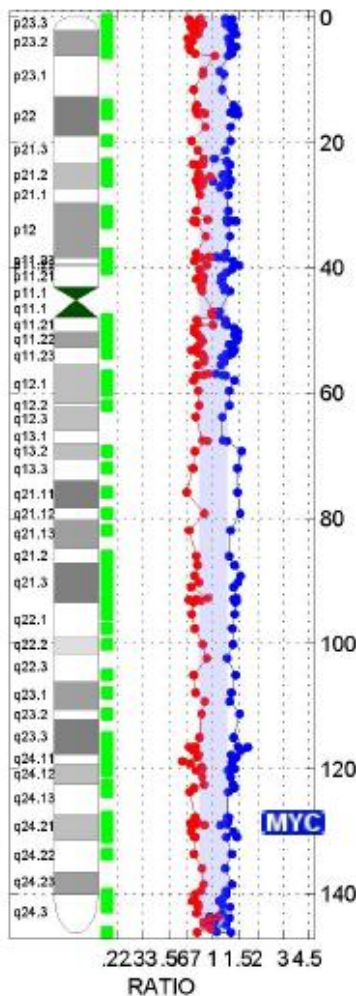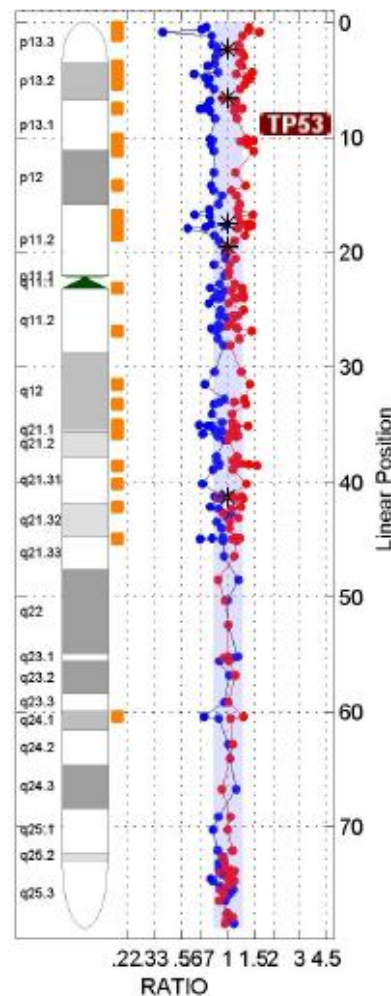

Supplement: MOESM2 [file 9642516]
